# Supplementary material for: Frailty as a Predictor of Outcomes in Subarachnoid Hemorrhage: A Systematic Review and Meta-Analysis
Source: MDPI journal article supplement (doi:10.3390/brainsci13101498), 2023-10-23
Supplement: s1 [file s1]

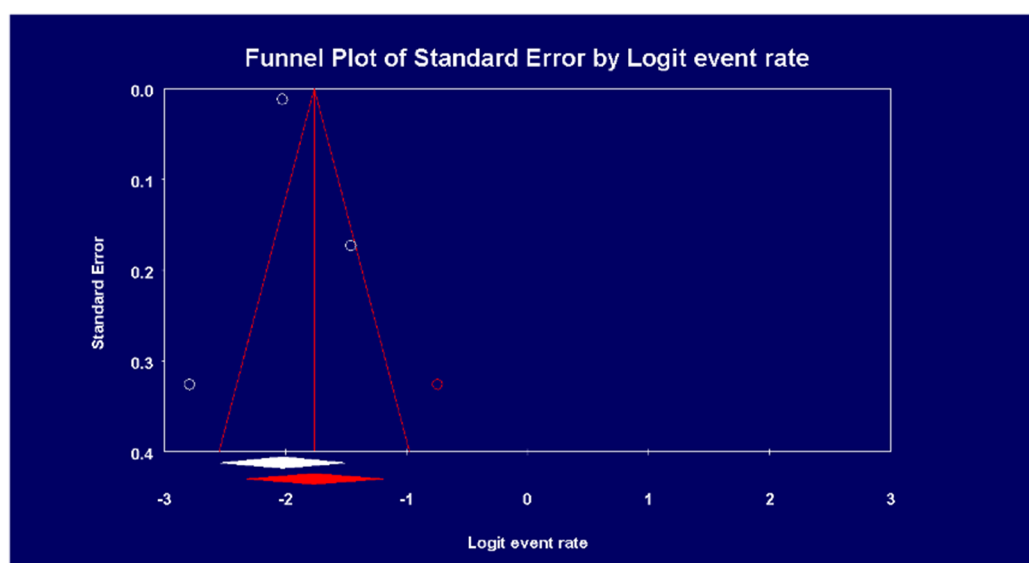

(a)

### Classic fail-safe N

|                                                               |            |
|---------------------------------------------------------------|------------|
| Z-value for observed studies                                  | -104.81728 |
| P-value for observed studies                                  | 0.00000    |
| Alpha                                                         | 0.05000    |
| Tails                                                         | 2.00000    |
| Z for alpha                                                   | 1.95996    |
| Number of observed studies                                    | 3.00000    |
| Number of missing studies that would bring p-value to > alpha | 8578.00000 |

(b)

### Duval and Tweedie's trim and fill

|                        |                 | Fixed Effects  |             |             | Random Effects |             |             | Q Value  |
|------------------------|-----------------|----------------|-------------|-------------|----------------|-------------|-------------|----------|
|                        | Studies Trimmed | Point Estimate | Lower Limit | Upper Limit | Point Estimate | Lower Limit | Upper Limit |          |
| <b>Observed values</b> |                 | 0.11661        | 0.11415     | 0.11911     | 0.11704        | 0.07356     | 0.18120     | 16.28243 |
| <b>Adjusted values</b> | 1               | 0.11679        | 0.11434     | 0.11930     | 0.14661        | 0.08905     | 0.23190     | 31.69691 |

(c)

**Figure S1. (a).** Through publication bias analysis, a slight asymmetry in the funnel plot is seen for SE by Logit Mortality rate for frail and non-frail patients with SAH. The red circle represents “missing” studies that have theoretically never been published due to publication bias, and the red diamond represents the “true” Logit event rate. This could indicate potential publication bias present in this meta-analysis as missing studies could alter the mean pooled mortality rate. **(b)** By using Duval and Tweedie’s trim and fill analysis, we

can hypothetically expect the mortality rate to increase from 11.7% to 14.7% if publication bias could be eliminated. However, this does not mean our original results are null. (c) By utilizing Classic fail-safe N analysis, we see that 8578 hypothetical missing studies would be required to raise the p-value  $> 0.05$ . That is over 2859 missing studies per study included in this meta-analysis, and therefore we believe our results (mortality rate of 11.7% CI 7.4% - 18.1%,  $p < 0.001$ ) are not null. In small meta-analyses ( $< 7$  studies), the point I<sup>2</sup> statistic can overestimate heterogeneity. Although I<sup>2</sup> was less than 50 (I<sup>2</sup> = 46.9), results should still be interpreted caution and with potential heterogeneity in mind because  $Q > Q(df)$ . Regardless, CI was reported in place of I<sup>2</sup> as suggested by von Hippel et al [30].
